# Supplementary material for: Genomic reconstruction of fossil and living microorganisms in ancient Siberian permafrost
Source: Microbiome. 2021 May 17;9:110. doi: 10.1186/s40168-021-01057-2 (PMC8130349; doi:10.1186/s40168-021-01057-2)
Supplement: Supplementary file 9 — Additional file 8: Table S7. MAGs that are closely related to genomes recovered from permafrost-associated soils. Note: MAGs with over 50% completeness were considered. [file 40168_2021_1057_MOESM8_ESM.xlsx]

## Sheet: Sheet1
Table S7	MAGs that are closely related to genomes recovered from permafrost-associated soils. Note: MAGs with over 50% completeness were considered.
MAGs	Taxanomy detemined from GTDB-tk	habitat
3_4_m_bin12	d__Bacteria;p__Nitrospirota;c__Nitrospiria;o__Nitrospirales;f__Nitrospiraceae;g__Palsa-1315;s__	palsa from Stordalen Mire in northern Sweden
3_4_m_bin2	d__Bacteria;p__Acidobacteriota;c__Vicinamibacteria;o__Fen-336;f__;g__;s__	fen from Stordalen Mire in northern Sweden
3_4_m_bin15	d__Bacteria;p__Acidobacteriota;c__Vicinamibacteria_A;o__Fen-336;f__Fen-336;g__AA29;s_	fen from Stordalen Mire in northern Sweden
3_4_m_bin16	d__Bacteria;p__Acidobacteriota;c__Vicinamibacteria_A;o__Fen-336;f__;g__;s__	fen from Stordalen Mire in northern Sweden
3_4_m_bin17	d__Bacteria;p__Gemmatimonadota;c__Gemmatimonadetes;o__Gemmatimonadales;f__Gemmatimonadaceae;g__Fen-1231;s__	fen from Stordalen Mire in northern Sweden
3_4_m_bin18	d__Bacteria;p__Proteobacteria;c__Alphaproteobacteria;o__Rhizobiales;f__Anderseniellaceae;g__PALSA-927;s_	palsa from Stordalen Mire in northern Sweden
3_4_m_bin19	d__Bacteria;p__Proteobacteria;c__Gammaproteobacteria;o__Burkholderiales;f__Palsa-1005;g__PALSA-1005;s__	palsa from Stordalen Mire in northern Sweden
5_8_m_bin23	d__Bacteria;p__Gemmatimonadota;c__Gemmatimonadetes;o__Gemmatimonadales;f__Gemmatimonadaceae;g__FEN-1250;s__	fen from Stordalen Mire in northern Sweden
5_8_m_bin6	d__Bacteria;p__Proteobacteria;c__Gammaproteobacteria;o__Burkholderiales;f__Burkholderiaceae;g__Polaromonas;s__	permafrost soil from Alaska and antarctic marine waters
5_8_m_bin7	d__Bacteria;p__Actinobacteriota;c__Actinomycetia;o__Actinomycetales;f__Beutenbergiaceae;g__T3246-1;s__	Tibetan Plateau glacier
5_8_m_bin11	d__Bacteria;p__Firmicutes_A;c__Clostridia;o__Clostridiales;f__Clostridiaceae;g__Clostridium_AD;s__Clostridium_AD tagluense	permafrost in the Mackenzie Delta, Northwest Territories, Canada
5_8_m_bin12	d__Bacteria;p__Firmicutes_A;c__Clostridia;o__Clostridiales;f__Clostridiaceae;g__Clostridium_AD;s__Clostridium_AD tagluense	permafrost in the Mackenzie Delta, Northwest Territories, Canada
14_8_m_bin31	d__Bacteria;p__Actinobacteriota;c__Acidimicrobiia;o__IMCC26256;f__PALSA-555;g__;s__	palsa from Stordalen Mire in northern Sweden
14_8_m_bin1	d__Bacteria;p__Actinobacteriota;c__RBG-13-55-18;o__Fen-727;f__;g__;s__	fen from Stordalen Mire in northern Sweden
